# Supplementary material for: One-pot synthesis of core/shell Co@C spheres by catalytic carbonization of mixed plastics and their application in the photo-degradation of Congo red
Source: Royal Society of Chemistry journal article supplement (doi:10.1039/c4ta00173g), 2014-01-01
Supplement: c4ta00173g1.pdf [file c4ta00173g1.pdf]

## Electronic Supporting Information (ESI)

# One-pot synthesis of core/shell Co@C spheres by catalytic carbonization of mixed plastics and their application in the photo-degradation of Cong red

5 Jiang Gong, Jie Liu, Xuecheng Chen, Zhiwei Jiang, Xin Wen, Ewa Mijowska, Tao Tang\*

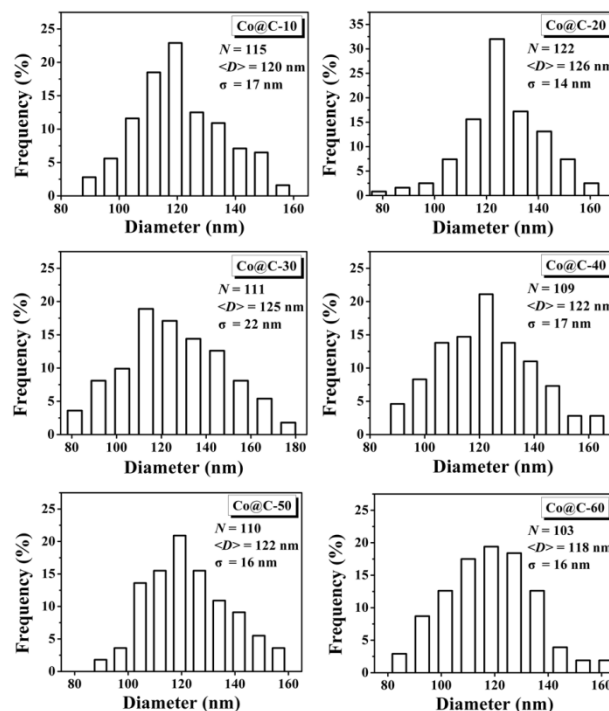

**Fig. S1** The diameter distribution of core/shell Co@C spheres measured according to the results of TEM 10 observations (Fig. 2).

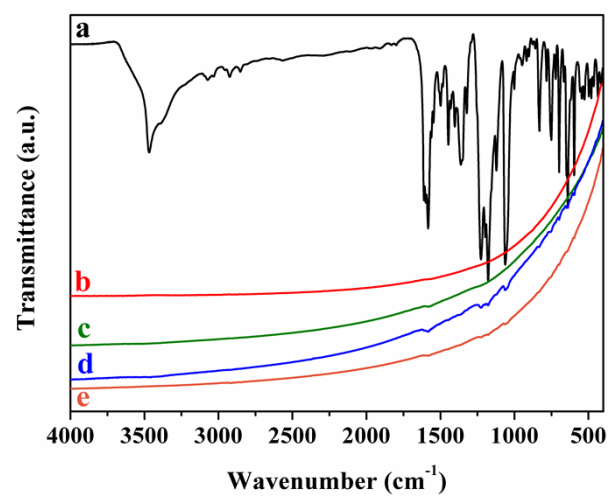

**Fig. S2** FT-IR spectra of CR (a), Co@C-60 (b), C-60 (c) and the recovered solids from Dark + Co@C-60 system (d) and Dark + C-60 system (e).

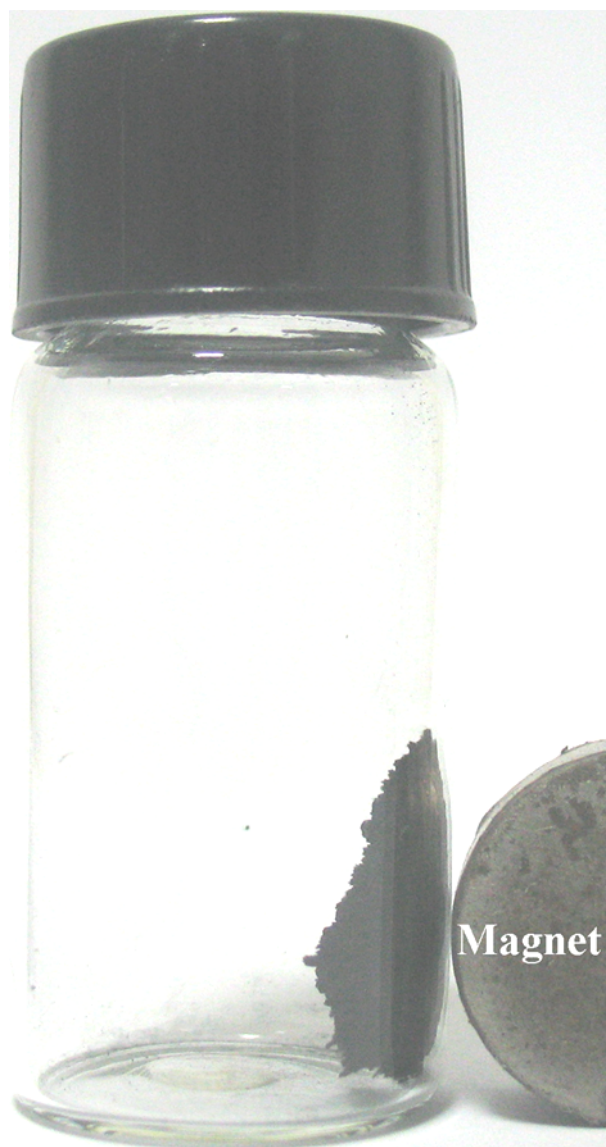

**Fig. S3** Photograph showing the core/shell Co@C-60 attracted by a magnet after being soaked in 12 M HCl solution for four weeks.

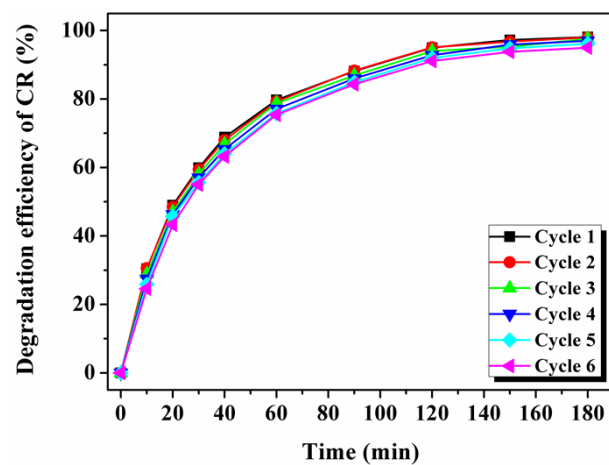

**Fig. S4** The degradation behavior of CR during different cycles under UV irradiation. Experimental conditions: Co@C-60 (or recycled Co@C-60) dosage = 1.0 g/L, initial CR concentration = 100 mg/L, initial H<sub>2</sub>O<sub>2</sub> concentration = 43.6 mM, and pH = 3.
